# Supplementary material for: Impact of Surface Area on Sensitivity in Autonomously Reporting Sensing Hydrogel Nanomaterials for the Detection of Bacterial Enzymes
Source: MDPI journal article supplement (doi:10.3390/chemosensors10080299), 2022-07-30
Supplement: s1 [file s1]

Archive with 1 entries (1 files):
- chemosensors-1803383-supplementary.pdf
